# Supplementary material for: Development of a 3D printer using scanning projection stereolithography
Source: PubMed Central journal article supplement (PMC4407727; doi:10.1038/srep09875), 2015-04-23
Supplement: srep09875-s1.pdf [file srep09875-s1.pdf]

# Development of a 3D printer using scanning projection stereolithography – Supplementary information

Michael P. Lee<sup>1</sup>, Geoffrey J. T. Cooper<sup>1</sup>, Trevor Hinkley<sup>1</sup>, Graham M. Gibson<sup>2</sup>, Miles J. Padgett<sup>2,\*</sup>, and Leroy Cronin<sup>1,\*\*</sup>

<sup>1</sup> School of Chemistry, University of Glasgow, G12 8QQ, UK

<sup>2</sup> School of Physics and Astronomy, SUPA, University of Glasgow, G12 8QQ, UK

\* [miles.padgett@glasgow.ac.uk](mailto:miles.padgett@glasgow.ac.uk);

\*\* [leroy.cronin@glasgow.ac.uk](mailto:leroy.cronin@glasgow.ac.uk)

## Additional Prints

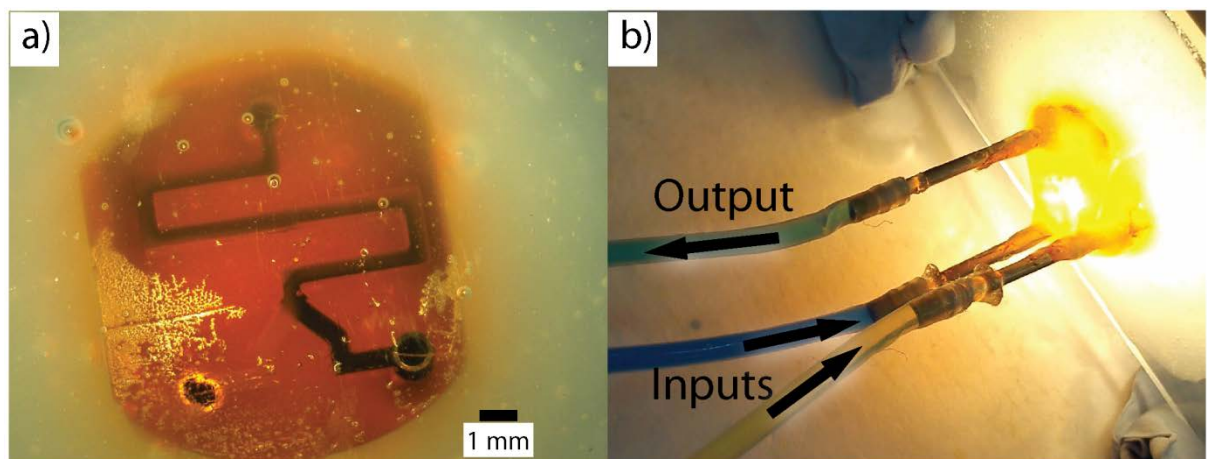

**Supplementary Figure S1:** Flow mixing millifluidic device, channels have a 400 $\mu$ m cross-section. 2 Aqueous dyes are used.

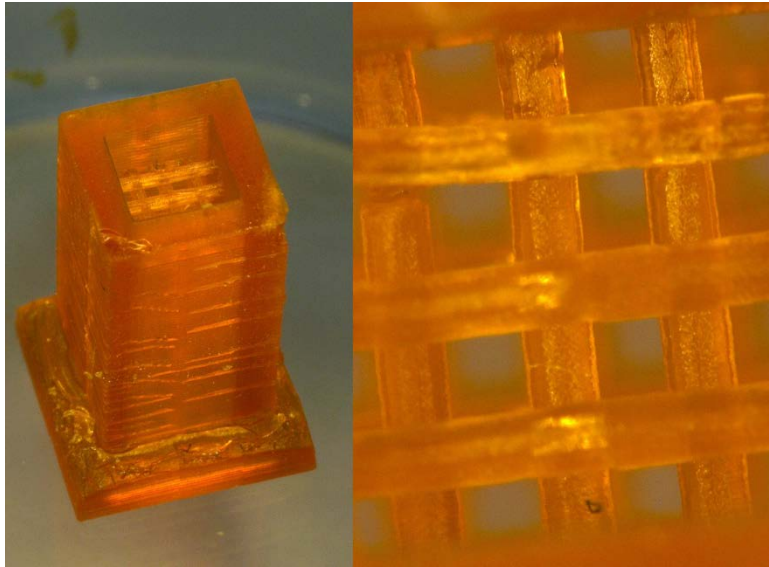

**Supplementart Figure S2:** A scaffold structure featuring 200 $\mu$ m struts in a 1cm tall unit.

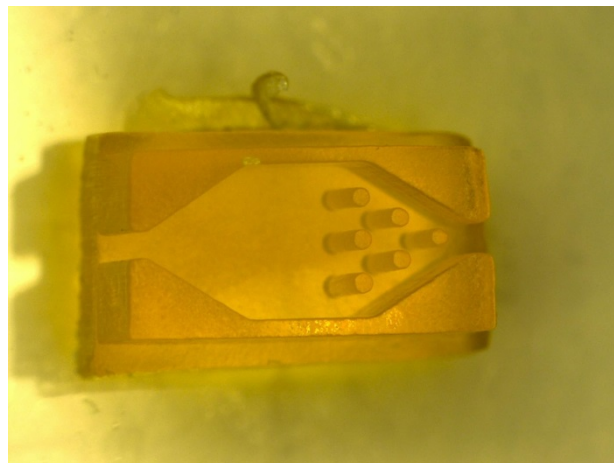

**Supplementary Figure S3:** "Bagatelle" structure

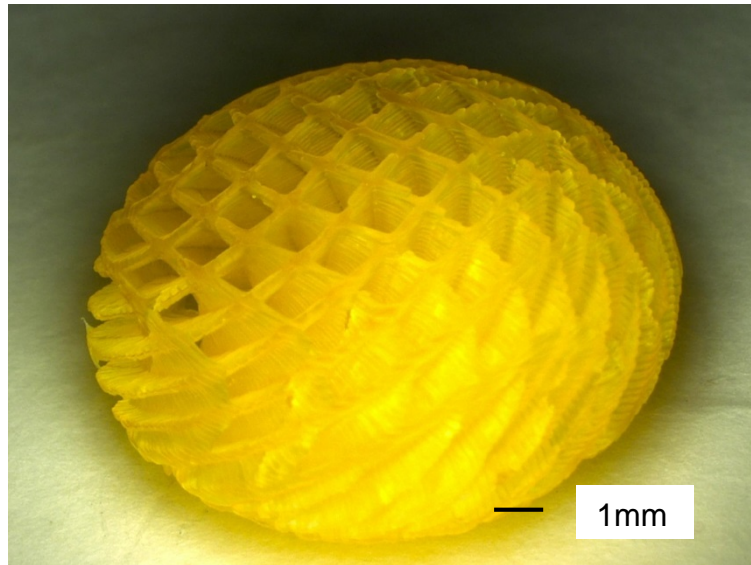

**Supplementary Figure S4:** Sphere with twisting internal structure

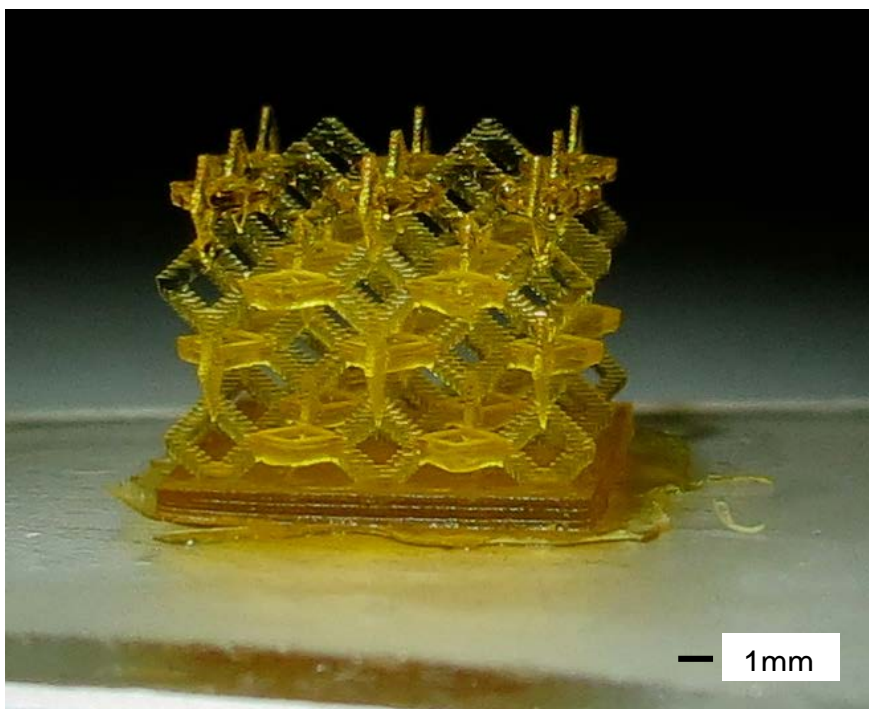

**Supplementary Figure S5:** A photograph of an intricate lattice structure.

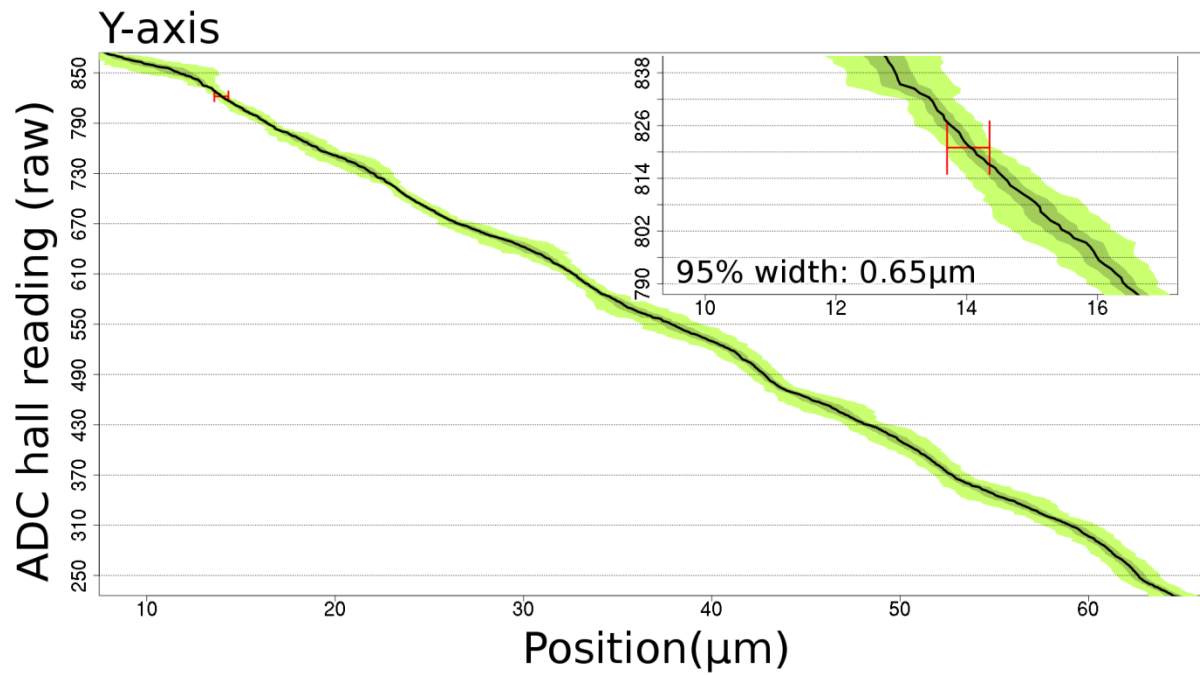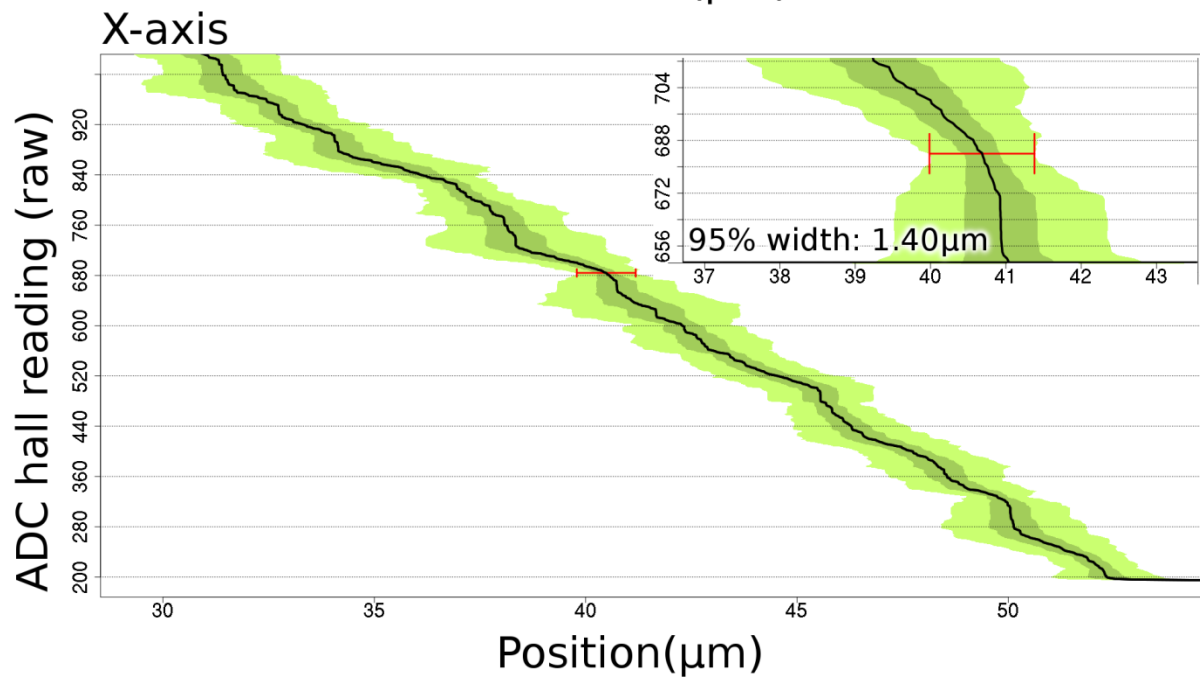

**Supplementary Figure S6:** Variation in the Hall sensor reading, at and around the home position for Y-axis (top) and X-axis (bottom). The variation in the reading give a positioning error of  $1\mu\text{m}$ .



## Calibration

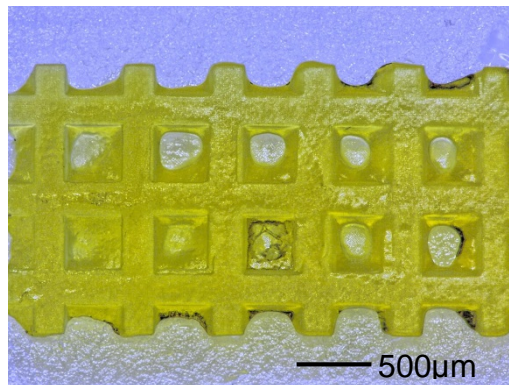

**Supplementary Figure S7:** Calibration of DMD pixel size to millimetres in the print. X and Y distances were measured with a Keyence digital microscope images analysis.

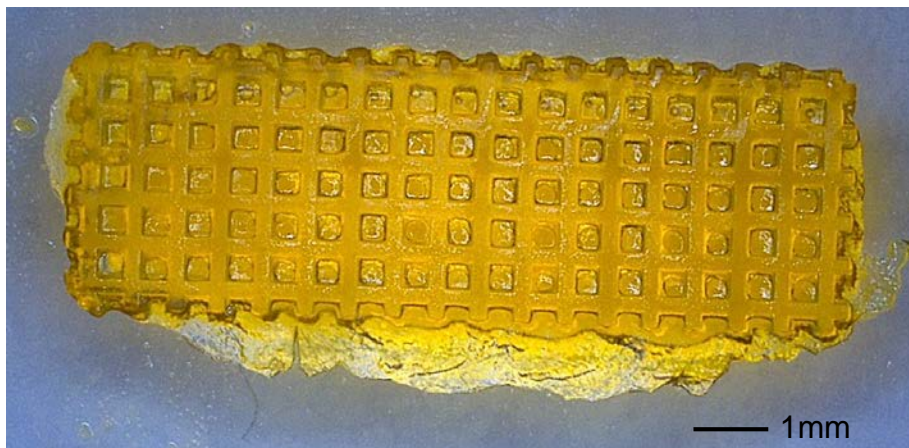

**Supplementary Figure S8:** Calibration of X stage microsteps to millimetres. Calibration was adjusted so that the projection module moved one image's width.

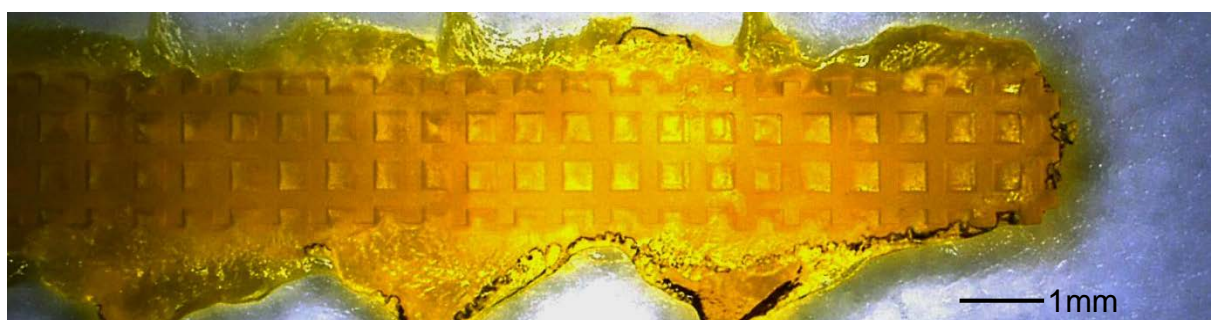

**Supplementary Figure S9:** Calibration of Y stage microsteps to millimetres. Calibration was adjusted so that the projection module moved one image's height.

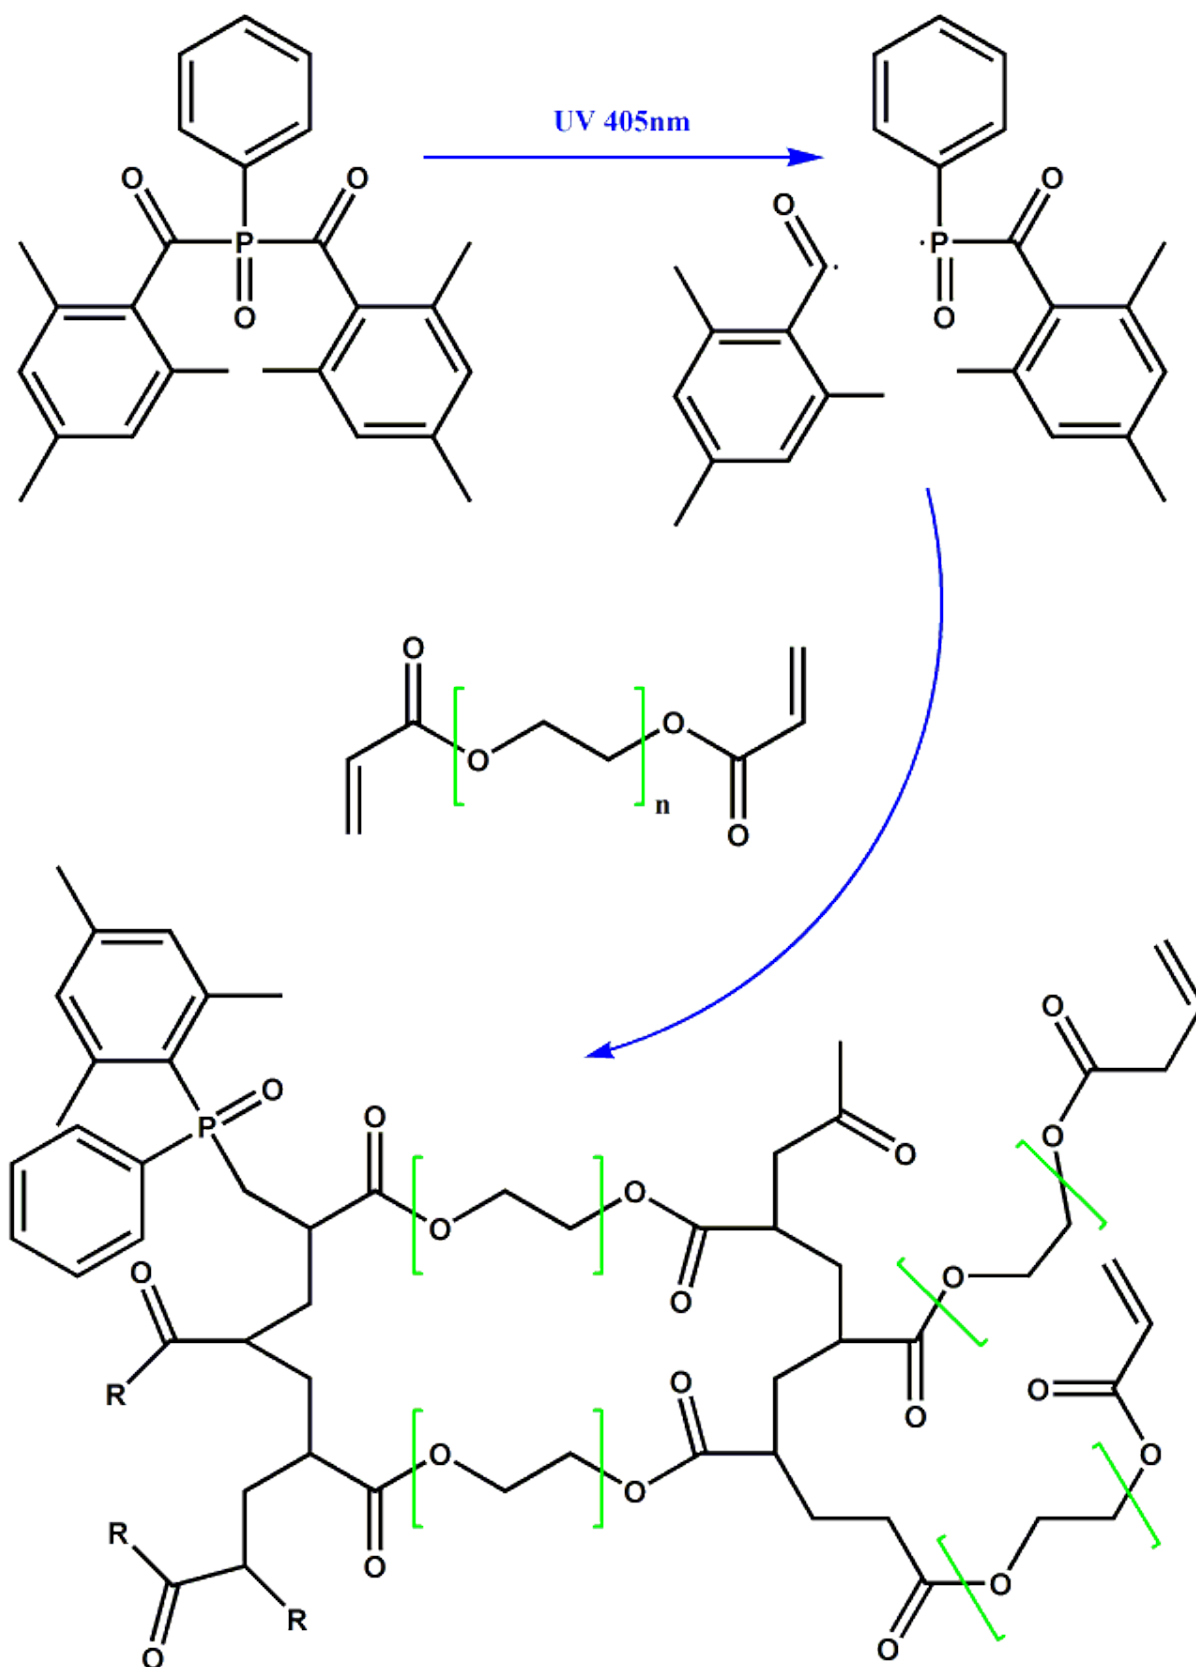

**Supplementary Figure S10:** Scheme of polymerisation reaction.

## Build Software

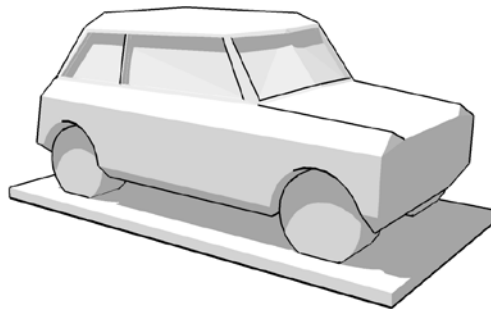

**Supplementary Figure S11:** Example STL file to be printed.

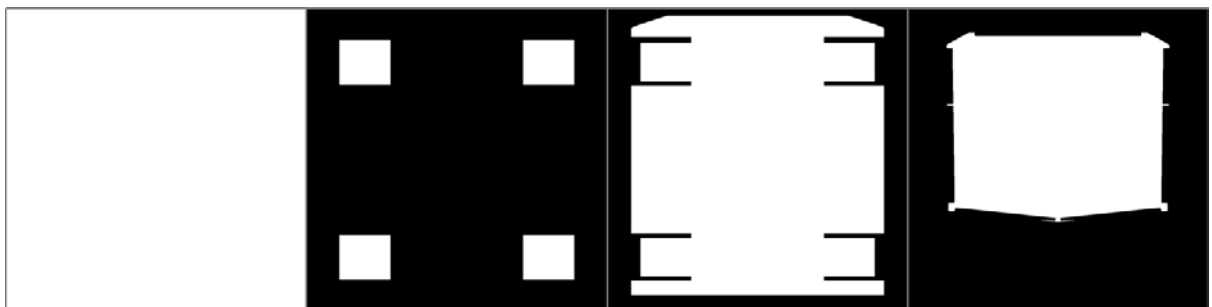

**Supplementary Figure S12:** Example PNG images created by horizontal slicing of the stl model. Owing to the mapping of pixels on the projector, our image files are stretched by a factor of two in x.

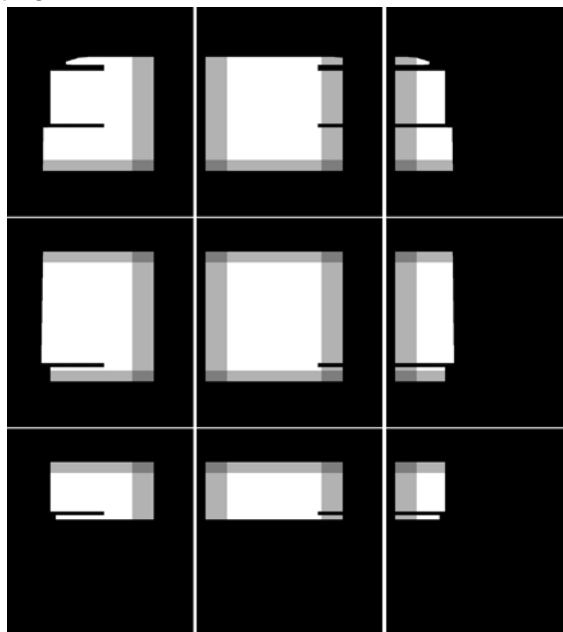

**Supplementary Figure S13:** The image is subdivided into individual exposures.

# Control Software

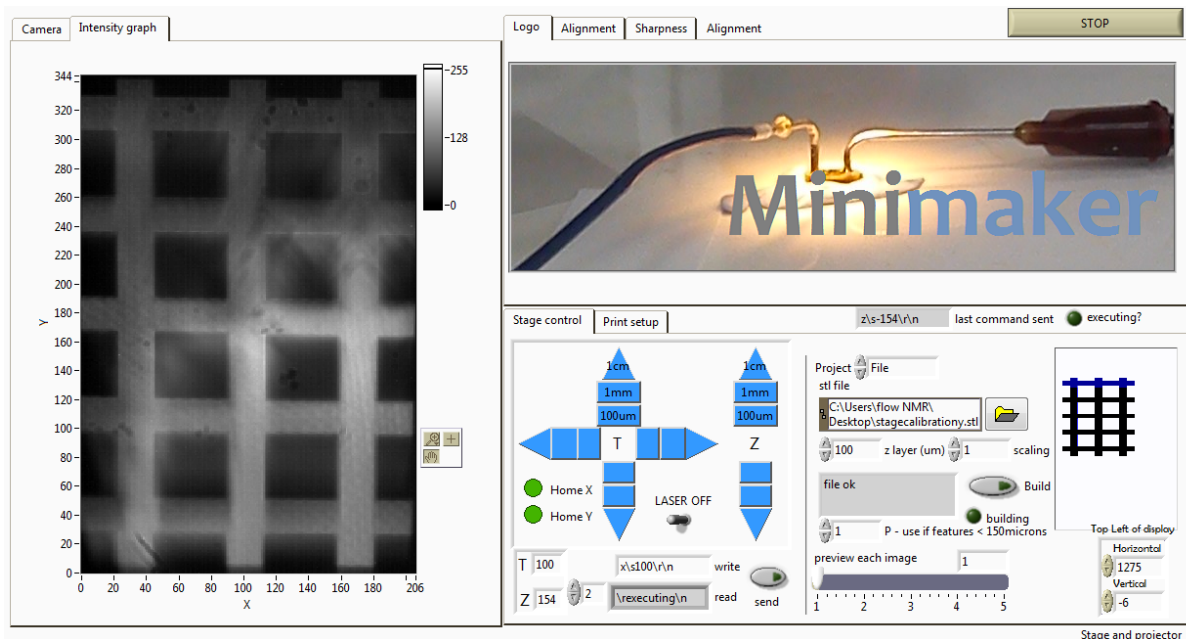

**Supplementary Figure S14:** Control software user interface (Stage control tab): Three axis stage controls, laser control, and build settings on right. Live camera images displayed on left.

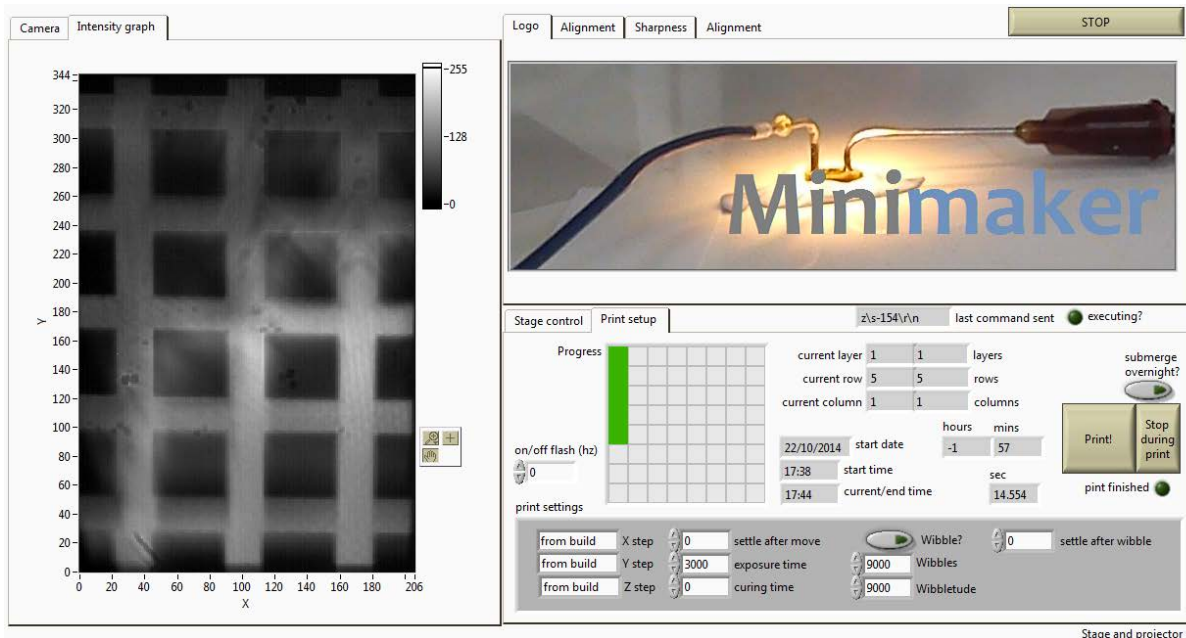

**Supplementary Figure S15:** Control software user interface (Print set up tab): Print settings such as exposure time controls, start print, and progress indicators.
